# Supplementary material
Source: PubMed Central journal article supplement (PMC5632222)
Supplement: NIHMS905132-supplement-supplement_1.pdf [file NIHMS905132-supplement-supplement_1.pdf]

518 **10 Supplementary Tables**

519 **Table S 1. Assay performance data of the calibration samples for VX-970 in human**  
 520 **plasma.**

| Analyte | Conc.<br>(ng/mL) | Accuracy<br>(%) | Intra-assay precision<br>(%) | Inter-assay precision<br>(%) |
|---------|------------------|-----------------|------------------------------|------------------------------|
| VX-970  | 3                | 100.1           | 3.8                          | *                            |
|         | 10               | 99.0            | 4.0                          | *                            |
|         | 30               | 99.7            | 2.9                          | 2.0                          |
|         | 100              | 101.9           | 2.4                          | 0.2                          |
|         | 300              | 101.0           | 2.8                          | 2.1                          |
|         | 1000             | 104.2           | 3.2                          | 1.7                          |
|         | 3000             | 99.2            | 2.3                          | *                            |
|         | 5000             | 96.6            | 3.2                          | 0.5                          |

521 N=15; triplicate results, each in 3 separate runs, for each concentration. \*The mean square of the  
 522 within runs was greater than the mean square of the between runs, indicating that there was no  
 523 significant additional variation due to the performance of the assay in different runs [20].

524  
 525  
 526

527 **Table S 2. Assay performance data for the quantitation of LLOQ, QCL, QCM, and QCH**  
 528 **VX-970 concentrations in human plasma.**

| Analyte | Concentration<br>(ng/mL) | Accuracy<br>(%) | Intra-assay precision<br>(%) | Inter-assay precision<br>(%) |
|---------|--------------------------|-----------------|------------------------------|------------------------------|
| VX-970  | 3 (LLOQ)                 | 101.4           | 6.6                          | *                            |
|         | 5 (QCL)                  | 98.5            | 8.4                          | 4.1                          |
|         | 150 (QCM)                | 98.1            | 2.6                          | 2.1                          |
|         | 4000 (QCH)               | 94.6            | 2.5                          | *                            |

529 N=18; 6 replicates in 3 separate runs, for each concentration. \*The mean square of the within  
 530 runs was greater than the mean square of the between runs, indicating that there was no  
 531 significant additional variation due to the performance of the assay in different runs [20].  
 532

533

534 **Table S 3. Recoveries VX-970 from plasma and respective matrix effect in plasma extract,**  
535 **with coefficients of variation (CV).**

| Analyte | Conc.<br>(ng/mL) | Recovery<br>(%) | CV<br>(%) | Matrix<br>Effect<br>(%) | CV<br>(%) |
|---------|------------------|-----------------|-----------|-------------------------|-----------|
| VX-970  | 5 (QCL)          | 96.5            | 7.7       | -6.6                    | 8.3       |
|         | 150 (QCM)        | 90.4            | 11.8      | -2.3                    | 4.0       |
|         | 4000 (QCH)       | 94.2            | 2.7       | -5.5                    | 2.4       |

536 N=4, for each concentration.

537

538

539

540 **Table S 4. Assay performance data of QCL, QCM, and QCH VX-970 in EDTA plasma**  
541 **with results based on heparin plasma curves relative to results based on EDTA plasma**  
542 **curves.**

| Analyte | Concentration<br>(ng/mL) | Accuracy<br>(%) | Precision<br>(%) |
|---------|--------------------------|-----------------|------------------|
| VX-970  | 5 (QCL)                  | -8.3            | 4.3              |
|         | 150 (QCM)                | 1.6             | 3.1              |
|         | 4000 (QCH)               | -0.1            | 2.0              |

543 N=4.

544

545

546

547 **Table S 5. Stability of VX-970 after incubating rat bile containing the glucuronide**  
548 **metabolite at room temperature for 4 h at varying pH.**

| Analyte | pH | Stability (%) | CV (%) |
|---------|----|---------------|--------|
| VX-970  | 5  | 104.3         | 6.0    |
|         | 6  | 96.9          | 10.3   |
|         | 7  | 102.5         | 4.1    |
|         | 8  | 97.1          | 7.7    |
|         | 9  | 101.1         | 11.1   |

549 N=4, for each condition

550

551 **11 Legends to Supplementary Figures**

552 **Fig. S. 1. Representative calibration curve (N=3 for each concentration) used to quantitate**  
553 **VX-970 human plasma samples (response VX-970 = 0.0773•conc + 0.0339; R<sup>2</sup>=0.9984).**  
554 **Calibration curve is depicted as response ratio versus nominal concentration (A), and as**  
555 **residuals (%) of the back-calculated relative to the nominal concentrations versus the log**  
556 **transformed concentration (B), the log-transformation on x-axis for visual purposes.**

557

558 **Fig. S. 2. Representative chromatograms of: (A) VX-970 (*m/z* 464.3>433.5; 1.9 min) added**  
559 **to control plasma at the LLOQ concentration of 3 ng/mL (top trace with an offset of 500**  
560 **counts) and control human plasma (bottom trace with an offset of 100 counts); (B) [d<sub>7</sub>]-VX-**  
561 **970 internal standard (*m/z* 471.3>440.3; 1.9 min) added to control plasma at a**  
562 **concentration of 100 ng/mL (top trace with an offset of 1000 counts) and control human**  
563 **plasma (bottom trace with an offset of 500 counts). (C) Bile of a rat dosed intravenously**  
564 **with 10 mg/kg VX-970 analyzed and monitored with *m/z* 464.3>433.5 (VX-970, top trace**  
565 **with an off-set of 8000 counts) and *m/z* 639.5>433.5 (VX-970 glucuronide, bottom trace**  
566 **with an off-set of 2000 counts).**

567

568 **Fig. S. 3. Chromatogram of VX-970 with selected phospholipid MRM channels. For visual**  
569 **purposes phospholipid MRM channels were offset from baseline response in increments of**  
570 **500,000 response counts.**

571

572

573 **12 Supplementary Figures**

574

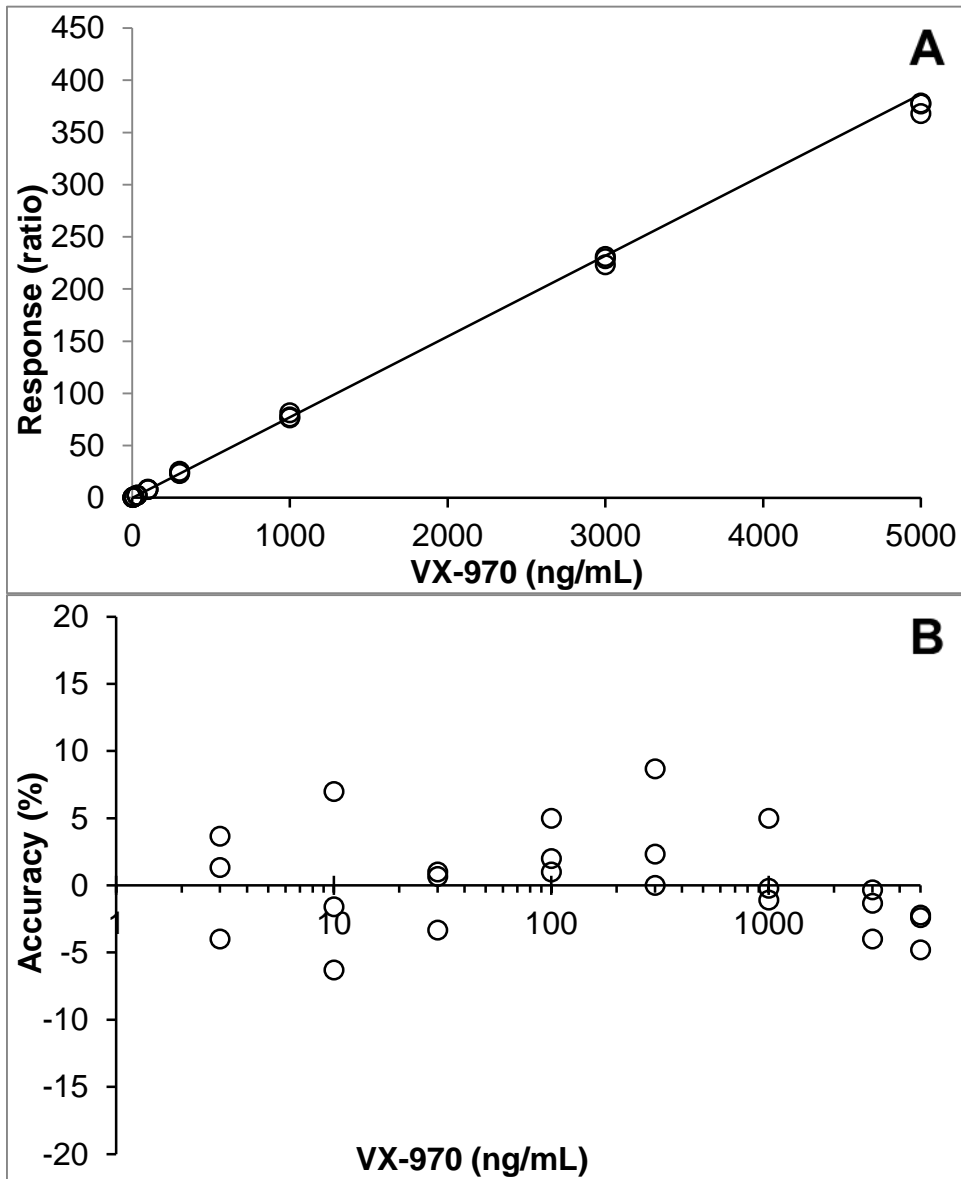

575

576

577

578 Fig. S. 1. Representative calibration curve (N=3 for each concentration) used to quantitate VX-  
579 970 human plasma samples (response VX-970 = 0.0773•conc + 0.0339; R<sup>2</sup>=0.9984). Calibration  
580 curve is depicted as response ratio *versus* nominal concentration (A), and as residuals (%) of the  
581 back-calculated relative to the nominal concentrations versus the log transformed concentration  
582 (B), the log-transformation on x-axis for visual purposes.  
583

584

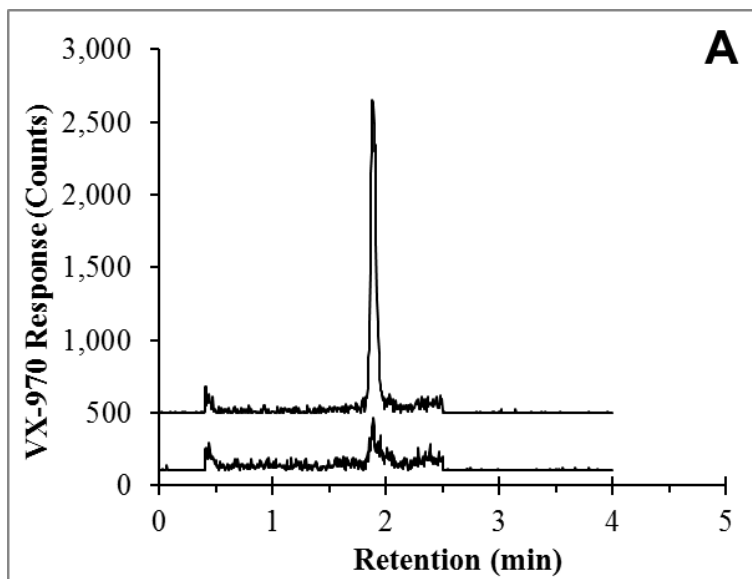

585

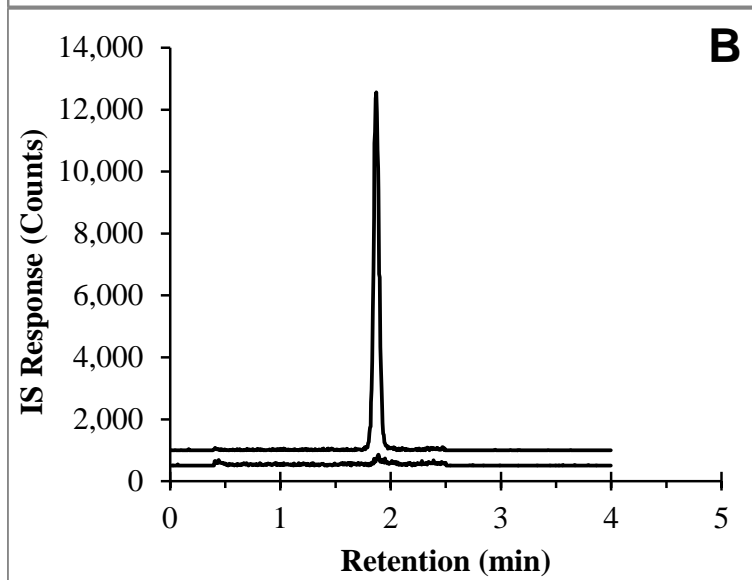

586



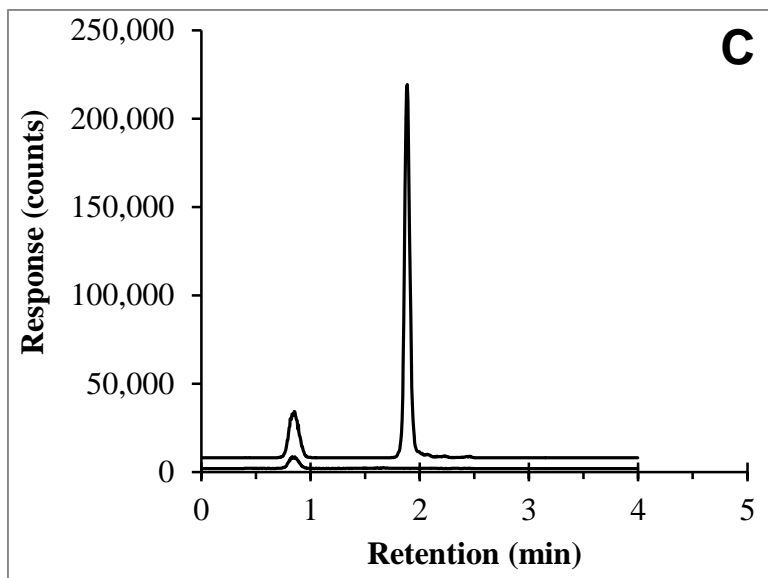

587  
588  
589 Fig. S. 2. Representative chromatograms of: (A) VX-970 ( $m/z$  464.3>433.5; 1.9 min) added to  
590 control plasma at the LLOQ concentration of 3 ng/mL (top trace with an offset of 500 counts)  
591 and control human plasma (bottom trace with an offset of 100 counts); (B) [d<sub>7</sub>]-VX-970 internal  
592 standard ( $m/z$  471.3>440.3; 1.9 min) added to control plasma at a concentration of 100 ng/mL  
593 (top trace with an offset of 1000 counts) and control human plasma (bottom trace with an offset  
594 of 500 counts). (C) Bile of a rat dosed intravenously with 10 mg/kg VX-970 analyzed and  
595 monitored with  $m/z$  464.3>433.5 (VX-970, top trace with an off-set of 8000 counts) and  $m/z$   
596 639.5>433.5 (VX-970 glucuronide, bottom trace with an off-set of 2000 counts).  
597

598

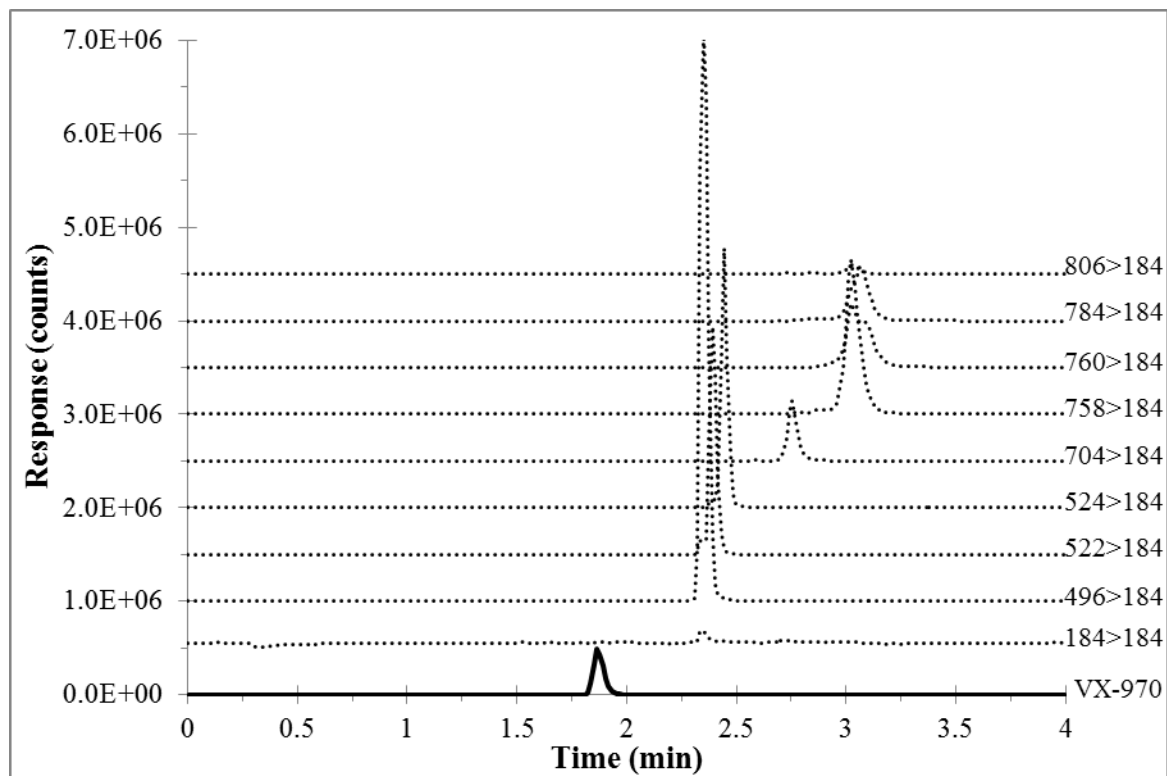

599  
600  
601  
602  
603  
604

Fig. S. 3. Chromatogram of VX-970 with selected phospholipid MRM channels. For visual purposes phospholipid MRM channels were offset from baseline response in increments of 500,000 response counts.
